# Supplementary material for: A new ancient lineage of frog (Anura: Nyctibatrachidae: Astrobatrachinae subfam. nov.) endemic to the Western Ghats of Peninsular India
Source: PeerJ. 2019 Mar 12;7:e6457. doi: 10.7717/peerj.6457 (PMC6419720; doi:10.7717/peerj.6457)
Supplement: Supplemental Information 1 [file peerj-07-6457-s001.xlsx]

## Sheet: Sup Mat CT data
Species	Accession number	XYZ voxel size mm	voltage KV	amperage µa	watts	exposure time	filter	projections	frame averaging	DOI
Astrobatrachus kurichiyana	CESF1565	0.0493174	60	300	18	0.333103	none	900	3	doi:10.17602/M2/M19727
Astrobatrachus kurichiyana	CESF2898	0.030456	80	87.5	7	-	none	1004	-	doi:10.17602/M2/M64566
Astrobatrachus kurichiyana	CESF2899	0.030456	80	87.5	7	-	none	1004	-	doi:10.17602/M2/M58042
Micrixalus adonis	CESF1647	0.0443627	60	250	15	0.333103	none	1000	3	doi:10.17602/M2/M19684
Micrixalus herrei	CAS-SU-7265	0.0474368	90	160	14.4	0.332453	none	1000	3	doi:10.17602/M2/M49968
Nyctibatrachus aliciae	CESF775	0.0504977	70	270	18.9	0.333103	0.5 mm Cu	900	3	doi:10.17602/M2/M19683
Nyctibatrachus humayuni	CAS-H-104261	0.0492756	90	190	17.1	0.200098	0.1 mm Cu	1500	3	doi:10.17602/M2/M47038
Nyctibatrachus major	CAS-H-125402	0.0311533	90	200	18	0.333096	none	1200	3	doi:10.17602/M2/M24198
Lankanectes corrugatus	FMNH-A&R-81229	0.018026	90	200	18	0.200098	none	2000	3	doi:10.17602/M2/M48666
Indirana phrynoderma	CESF648	0.0504977	70	270	18.9	0.333103	0.5 mm Cu	800	3	doi:10.17602/M2/M19680
Indirana beddomii	CASSU7259	0.028849	125	150	18.75	0.200098	none	1300	3	doi:10.17602/M2/M48578
Walkerana leptodactyla	CAS104235	0.0276363	100	200	20	0.200098	none	2000	3	doi:10.17602/M2/M62531
Indirana leithii	CAS104290	0.028216	110	150	16.5	0.200098	none	1400	3	doi:10.17602/M2/M48579
Walkerana diplosticta	FMNH-A&R-217983	0.020846	80	190	15.2	0.200098	none	2000	3	doi:10.17602/M2/M48667
